# Supplementary material for: Utility of Genetic Testing from the Perspective of Parents/Caregivers: A Scoping Review
Source: Children (Basel). 2021 Mar 27;8(4):259. doi: 10.3390/children8040259 (PMC8067127; doi:10.3390/children8040259)
Supplement: Supplementary file 1 [file children-08-00259-s001.pdf]

## Supplementary File:

**Figure S1.** Search Strategy.

The full list of search terms included: \*Genetic Testing/ [OR] exome sequencing.tw,kf. [OR] genetic counseling.tw,kf. [OR] genetic counselling.tw,kf. [OR] genetic information.tw,kf. [OR] genetic predictive test\$.tw,kf. [OR] genetic predisposition test\$.tw,kf. [OR] genetic screen\$.tw,kf. [OR] genetic sequencing.tw,kf. [OR] genetic test\$.tw,kf. [OR] genome based test\$.tw,kf. [OR] genomic information.tw,kf. [OR] genomic sequencing.tw,kf. [OR] genom\$ test\$.tw,kf. [OR] genomic? profiling.tw,kf. [OR] "direct to consumer testing".tw,kf. [OR] "direct to consumer genetic?".tw,kf. [OR] "direct to consumer genomic?".tw,kf. [AND] patient outcome assessment/ [OR] patient reported outcome measures/ [OR] Patient Preference/ [OR] caregiver utility.tw,kf. [OR] clinical meaning.tw,kf. [OR] clinical utility.tw,kf. [OR] clinical value?.tw,kf. [OR] conjoint analys#s.tw,kf. [OR] consumer meaning.tw,kf. [OR] consumer utility.tw,kf. [OR] consumer value.tw,kf. [OR] discrete choice experiment?.tw,kf. [OR] famil\$ utility.tw,kf. [OR] health\$ utility.tw,kf. [OR] health-related utility.tw,kf. [OR] individual meaning.tw,kf. [OR] individual utility.tw,kf. [OR] individual value.tw,kf. [OR] medical meaning.tw,kf. [OR] medical utility.tw,kf. [OR] medical value?.tw,kf. [OR] nonclinical benefit?.tw,kf. [OR] non-clinical benefit?.tw,kf. [OR] nonclinical harm?.tw,kf. [OR] non-clinical harm?.tw,kf. [OR] nonmedical benefit?.tw,kf. [OR] non-medical benefit?.tw,kf. [OR] nonmedical harm?.tw,kf. [OR] non-medical harm?.tw,kf. [OR] parent\$ utility.tw,kf. [OR] parent\$ useful\$.tw,kf. [OR] parent\$ perception?.tw,kf. [OR] parent\$ experience?.tw,kf. [OR] parent\$ value?.tw,kf. [OR] participant meaning.tw,kf. [OR] participant utility.tw,kf. [OR] participant\$ value?.tw,kf. [OR] patient meaning?.tw,kf. [OR] patient reported outcome?.tw,kf. [OR] patient? utility.tw,kf. [OR] patient? value?.tw,kf. [OR] personal benefit?.tw,kf. [OR] personal harm?.tw,kf. [OR] personal meaning?.tw,kf. [OR] personal outcome?.tw,kf. [OR] personal utility.tw,kf. [OR] personal value?.tw,kf. [OR] public meaning.tw,kf. [OR] public utility.tw,kf. [OR] public value?.tw,kf. [OR] ("willing to pay\$" [OR] "willingness to pay\$").tw,kf.

Table S1. Quality appraisal scores.

| Qualitative studies                                               |   |   |   |   |   |   |   |    |    |    |    |    |    |    |    |    |    |    |    |    |     |     |     |     |
|-------------------------------------------------------------------|---|---|---|---|---|---|---|----|----|----|----|----|----|----|----|----|----|----|----|----|-----|-----|-----|-----|
| Assigned study number                                             | 1 | 3 | 4 | 5 | 6 | 7 | 9 | 10 | 11 | 12 | 13 | 15 | 16 | 21 | 23 | 24 | 26 | 30 | 31 | 33 | 18* | 20* | 27* | 28* |
| 1) Question/objective sufficiently described?                     | 2 | 2 | 2 | 2 | 1 | 2 | 2 | 1  | 2  | 2  | 1  | 1  | 2  | 2  | 2  | 1  | 2  | 2  | 2  | 2  | 2   | 2   | 2   | 2   |
| 2) Study design evident and appropriate?                          | 2 | 2 | 2 | 2 | 2 | 2 | 2 | 2  | 2  | 2  | 2  | 2  | 2  | 2  | 2  | 1  | 2  | 2  | 2  | 2  | 2   | 2   | 2   | 2   |
| 3) Context for study clear?                                       | 2 | 2 | 2 | 2 | 2 | 1 | 1 | 2  | 1  | 2  | 2  | 2  | 2  | 2  | 2  | 2  | 2  | 2  | 2  | 2  | 2   | 2   | 2   | 2   |
| 4) Connection to a theoretical framework/wider body of knowledge? | 2 | 2 | 1 | 2 | 1 | 1 | 2 | 1  | 1  | 2  | 2  | 2  | 2  | 1  | 2  | 2  | 2  | 2  | 2  | 2  | 1   | 1   | 2   | 2   |
| 5) Sampling strategy described, relevant and justified?           | 1 | 2 | 1 | 2 | 2 | 1 | 0 | 0  | 1  | 2  | 1  | 0  | 1  | 1  | 1  | 2  | 2  | 2  | 2  | 1  | 1   | 1   | 2   | 2   |
| 6) Data collection methods clearly described and systematic?      | 1 | 2 | 1 | 2 | 2 | 2 | 1 | 2  | 1  | 1  | 1  | 1  | 2  | 2  | 2  | 2  | 2  | 2  | 2  | 1  | 2   | 2   | 2   | 1   |
| 7) Data analysis clearly described and systematic?                | 2 | 2 | 2 | 2 | 2 | 2 | 2 | 2  | 1  | 2  | 2  | 2  | 1  | 2  | 2  | 2  | 2  | 2  | 2  | 2  | 2   | 1   | 2   | 1   |
| 8) Use of verification procedure(s) to establish credibility?     | 0 | 2 | 2 | 2 | 2 | 2 | 2 | 2  | 2  | 2  | 0  | 2  | 2  | 2  | 2  | 0  | 2  | 2  | 2  | 2  | 2   | 0   | 2   | 0   |

|                                          |           |           |           |           |           |           |           |           |           |           |           |           |           |           |           |           |           |           |           |           |           |           |           |           |
|------------------------------------------|-----------|-----------|-----------|-----------|-----------|-----------|-----------|-----------|-----------|-----------|-----------|-----------|-----------|-----------|-----------|-----------|-----------|-----------|-----------|-----------|-----------|-----------|-----------|-----------|
| 9) Conclusions supported by the results? | 2         | 2         | 2         | 2         | 2         | 2         | 1         | 2         | 1         | 2         | 2         | 1         | 1         | 1         | 2         | 1         | 2         | 2         | 2         | 2         | 2         | 2         | 2         | 2         |
| 10) Reflexivity of the account?          | 1         | 1         | 1         | 1         | 1         | 1         | 1         | 0         | 1         | 1         | 1         | 0         | 1         | 1         | 0         | 0         | 1         | 1         | 1         | 1         | 1         | 1         | 0         | 1         |
| Total                                    | 15        | 19        | 16        | 19        | 17        | 16        | 14        | 14        | 13        | 18        | 14        | 13        | 16        | 16        | 17        | 13        | 19        | 19        | 19        | 17        | 17        | 14        | 18        | 15        |
| Out of                                   | 20        | 20        | 20        | 20        | 20        | 20        | 20        | 20        | 20        | 20        | 20        | 20        | 20        | 20        | 20        | 20        | 20        | 20        | 20        | 20        | 20        | 20        | 20        | 20        |
| <b>Percent score (%)</b>                 | <b>75</b> | <b>95</b> | <b>80</b> | <b>95</b> | <b>85</b> | <b>80</b> | <b>70</b> | <b>70</b> | <b>65</b> | <b>90</b> | <b>70</b> | <b>65</b> | <b>80</b> | <b>80</b> | <b>85</b> | <b>65</b> | <b>95</b> | <b>95</b> | <b>95</b> | <b>85</b> | <b>85</b> | <b>70</b> | <b>90</b> | <b>75</b> |

\*Mixed methods papers were not included in the calculation of the average qualitative quality score

| <b>Quantitative studies</b>                                                                                         |          |          |           |           |           |           |           |           |           |            |            |            |            |
|---------------------------------------------------------------------------------------------------------------------|----------|----------|-----------|-----------|-----------|-----------|-----------|-----------|-----------|------------|------------|------------|------------|
| <b>Assigned study number</b>                                                                                        | <b>2</b> | <b>8</b> | <b>14</b> | <b>17</b> | <b>19</b> | <b>22</b> | <b>25</b> | <b>29</b> | <b>32</b> | <b>18*</b> | <b>20*</b> | <b>27*</b> | <b>28*</b> |
| 1) Question/objective sufficiently described?                                                                       | 2        | 2        | 2         | 2         | 2         | 2         | 2         | 2         | 2         | 1          | 2          | 2          | 2          |
| 2) Study design evident and appropriate?                                                                            | 2        | 2        | 2         | 2         | 2         | 2         | 2         | 2         | 2         | 2          | 2          | 2          | 2          |
| 3) Method of subject/comparison group selection or source of information/input variables described and appropriate? | 1        | 2        | 1         | 1         | 2         | 1         | 2         | 2         | 1         | 2          | 2          | 2          | 2          |
| 4) Subject (and comparison group, if applicable) characteristics sufficiently described?                            | 1        | 2        | 1         | 2         | 1         | 2         | 2         | 2         | 2         | 2          | 2          | 2          | 1          |
| 5) If interventional and random allocation was possible, was it described?                                          | N/A      | N/A      | N/A       | N/A       | N/A       | N/A       | N/A       | 2         | N/A       | N/A        | 1          | N/A        | N/A        |
| 6) If interventional and blinding of investigators was possible, was it reported?                                   | N/A      | N/A      | N/A       | N/A       | N/A       | N/A       | N/A       | N/A       | N/A       | N/A        | 2          | N/A        | N/A        |
| 7) If interventional and blinding of subjects was possible, was it reported?                                        | N/A      | N/A      | N/A       | N/A       | N/A       | N/A       | N/A       | N/A       | N/A       | N/A        | 2          | N/A        | N/A        |
| 8) Outcome and (if applicable) exposure measure(s) well de-                                                         | 1        | 2        | 2         | 1         | 2         | 2         | 2         | 2         | 2         | 1          | 1          | 2          | 2          |

|                                                                                            |             |             |             |             |             |             |             |             |             |             |             |             |             |
|--------------------------------------------------------------------------------------------|-------------|-------------|-------------|-------------|-------------|-------------|-------------|-------------|-------------|-------------|-------------|-------------|-------------|
| defined and robust to measurement/misclassification bias?<br>Means of assessment reported? |             |             |             |             |             |             |             |             |             |             |             |             |             |
| 9) Sample size appropriate?                                                                | 2           | 2           | 2           | 0           | 2           | 2           | 2           | 1           | 2           | 1           | 1           | 1           | 1           |
| 10) Analytic methods described/justified and appropriate?                                  | 2           | 2           | 1           | 2           | 2           | 2           | 2           | 2           | 2           | 2           | N/A         | 2           | 2           |
| 11) Some estimate of variance is reported for the main results?                            | 0           | 2           | 1           | 2           | 2           | 2           | 2           | 2           | 2           | 2           | 0           | 2           | 0           |
| 12) Controlled for confounding?                                                            | 1           | 2           | N/A         | 2           | 0           | 0           | 1           | 1           | 2           | 2           | 1           | 1           | 1           |
| 13) Results reported in sufficient detail?                                                 | 1           | 1           | 2           | 1           | 2           | 2           | 2           | 2           | 2           | 2           | 2           | 2           | 2           |
| 14) Conclusions supported by the results?                                                  | 1           | 2           | 1           | 2           | 2           | 2           | 2           | 2           | 2           | 2           | 2           | 2           | 2           |
| Total                                                                                      | 14          | 21          | 15          | 17          | 19          | 19          | 21          | 22          | 21          | 19          | 20          | 20          | 17          |
| Out of                                                                                     | 22          | 22          | 20          | 22          | 22          | 22          | 22          | 24          | 22          | 22          | 26          | 22          | 22          |
| <b>Percent score (%)</b>                                                                   | <b>63.6</b> | <b>95.5</b> | <b>75.0</b> | <b>77.3</b> | <b>86.4</b> | <b>86.4</b> | <b>95.5</b> | <b>91.6</b> | <b>95.5</b> | <b>86.4</b> | <b>76.9</b> | <b>90.9</b> | <b>77.3</b> |

\*Mixed methods papers were not included in the calculation of the average quantitative quality score

| <b>MMAT</b>                                                                                              |           |           |           |           |
|----------------------------------------------------------------------------------------------------------|-----------|-----------|-----------|-----------|
| <b>Assigned study number</b>                                                                             | <b>18</b> | <b>20</b> | <b>27</b> | <b>28</b> |
| 1) Is there an adequate rationale for using a mixed methods design to address the research question      | 0         | 2         | 2         | 2         |
| 2) Are the different components of the study effectively integrated to answer the research question?     | 1         | 2         | 2         | 2         |
| 3) Are the outputs of the integration of qualitative and quantitative components adequately interpreted? | 1         | 1         | 2         | 2         |

|                                                                                                                       |             |             |             |             |
|-----------------------------------------------------------------------------------------------------------------------|-------------|-------------|-------------|-------------|
| 4) Are divergences and inconsistencies between quantitative and qualitative results adequately addressed?             | 0           | 1           | 2           | 2           |
| 5) Do the different components of the study adhere to the quality criteria of each tradition of the methods involved? | 2           | 2           | 2           | 1           |
| MMAT total                                                                                                            | 4           | 8           | 8           | 9           |
| MMAT out of                                                                                                           | 10          | 10          | 10          | 10          |
|                                                                                                                       |             |             |             |             |
| Qualitative total                                                                                                     | 17          | 14          | 18          | 15          |
| Quantitative total                                                                                                    | 19          | 20          | 20          | 17          |
| Mixed methods total (MMAT + Qual + Quant)                                                                             | 40          | 42          | 48          | 41          |
| Out of                                                                                                                | 52          | 56          | 52          | 52          |
| <b>Percent score (%)</b>                                                                                              | <b>76.9</b> | <b>75.0</b> | <b>92.3</b> | <b>78.8</b> |

**Table S2.** Scoping review studies and assigned study number.

| Assigned Study Number | First Author + Year     | Study Title                                                                                                                                                    |
|-----------------------|-------------------------|----------------------------------------------------------------------------------------------------------------------------------------------------------------|
| 1                     | Chudleigh 2016 [30]     | Parents' experiences of receiving the initial positive Newborn Screening (NBS) result for Cystic Fibrosis and Sickle Cell Disease                              |
| 2                     | Gebhardt 2016 [29]      | How do patient perceived determinants influence the decision-making process to accept or decline preimplantation genetic screening?                            |
| 3                     | Hayeems 2016 [15]       | Parents' experience with pediatric microarray: Transferrable lessons in the era of genomic counseling                                                          |
| 4                     | Hodgson 2016 [46]       | Experiences of prenatal diagnosis and decision-making about termination of pregnancy: A qualitative study                                                      |
| 5                     | Kerruish 2016 [45]      | Parents' experiences 12 years after newborn screening for genetic susceptibility to type 1 diabetes and their attitudes to whole-genome sequencing in newborns |
| 6                     | Krabbenborg 2016a [44]  | Evaluating a counselling strategy for diagnostic WES in paediatric neurology: an exploration of parents' information and communication needs                   |
| 7                     | Krabbenborg 2016b [43]  | Understanding the psychosocial effects of WES test results on parents of children with rare diseases                                                           |
| 8                     | Lingen 2016 [42]        | Obtaining a genetic diagnosis in a child with disability: impact on parental quality of life                                                                   |
| 9                     | Rosell 2016 [41]        | Not the end of the odyssey: Parental perceptions of Whole Exome Sequencing (WES) in pediatric undiagnosed disorders                                            |
| 10                    | Van der Steen 2016 [40] | The psychological impact of prenatal diagnosis and disclosure of susceptibility loci: First impressions of parents' experiences                                |
| 11                    | Vears 2016 [39]         | Parents' experiences with requesting carrier testing for their unaffected children                                                                             |
| 12                    | Wilkins 2016 [38]       | "It wasn't a disaster or anything": Parents' experiences of their child's uncertain chromosomal microarray result                                              |
| 13                    | Malek 2017 [37]         | Parental Perspectives on Whole-Exome Sequencing in Pediatric Cancer: A Typology of Perceived Utility                                                           |
| 14                    | Palomaki 2017 [36]      | The clinical utility of DNA-based screening for fetal aneuploidy by primary obstetrical care providers in the general pregnancy population                     |
| 15                    | Stivers 2017 [35]       | The actionability of exome sequencing testing results                                                                                                          |
| 16                    | Barton 2018 [34]        | Pathways from autism spectrum disorder diagnosis to genetic testing                                                                                            |
| 17                    | Desai 2018 [33]         | Impacts of variants of uncertain significance on parental perceptions of children after prenatal chromosome microarray testing                                 |
| 18                    | Harrington 2018 [32]    | Parental perception and participation in genetic testing among children with Autism Spectrum Disorders                                                         |
| 19                    | Szczepura 2018 [31]     | UK families with children with rare chromosome disorders: Changing experiences of diagnosis and counselling                                                    |
| 20                    | Williams 2018 [47]      | Impact of a patient-facing enhanced genomic results report to improve understanding, engagement, and communication                                             |
| 21                    | Wou 2018 [52]           | Parental perceptions of prenatal whole exome sequencing                                                                                                        |
| 22                    | Wynn 2018 [53]          | Diagnostic exome sequencing in children: A survey of parental understanding, experience and psychological impact                                               |
| 23                    | Inglese 2019 [50]       | New developmental syndromes: Understanding the family experience                                                                                               |
| 24                    | Malek 2019 [49]         | Responsibility, culpability, and parental views on genomic testing for seriously ill children                                                                  |

|    |                    |                                                                                                                                 |
|----|--------------------|---------------------------------------------------------------------------------------------------------------------------------|
| 25 | Taber 2019 [48]    | Clinical utility of expanded carrier screening: results-guided actionability and outcomes                                       |
| 26 | Aldridge 2020 [53] | Rapid genome-wide sequencing in a neonatal intensive care unit: A retrospective qualitative exploration of parental experiences |
| 27 | Berrios 2020 [54]  | Parents of newborns in the NICU enrolled in genome sequencing research: hopeful, but not naïve                                  |
| 28 | Brett 2020 [55]    | Parental experiences of ultrarapid genomic testing for their critically unwell infants and children                             |
| 29 | Cakici 2020 [56]   | A Prospective Study of Parental Perceptions of Rapid Whole-Genome and -Exome Sequencing among Seriously Ill Infants             |
| 30 | Luksic 2020 [57]   | A qualitative study of Latinx parents' experiences of clinical exome sequencing                                                 |
| 31 | Mollison 2020 [58] | Parents' perceptions of personal utility of exome sequencing results                                                            |
| 32 | Riggan 2020 [59]   | Family experiences and attitudes about receiving the diagnosis of sex chromosome aneuploidy in a child                          |
| 33 | Sadow 2020 [60]    | Parental experiences and genetic counsellor roles in Pierre Robin sequence                                                      |
